# Supplementary material for: Elements of integrated care approaches for older people: a review of reviews
Source: PubMed Central journal article supplement — BMJ Open. 2018 Apr 7;8(4):e021194. doi: 10.1136/bmjopen-2017-021194 (PMC5892746; doi:10.1136/bmjopen-2017-021194), 2018-04-07
Supplement: bmjopen-2017-021194supp002.pdf [file bmjopen-2017-021194supp002.pdf]

## Supplementary file 2. Electronic search strategies

**Table 1. Search strategy for Medline**

| MEDLINE |                                                                                                                                                                                                            |
|---------|------------------------------------------------------------------------------------------------------------------------------------------------------------------------------------------------------------|
| 1       | exp Aged/                                                                                                                                                                                                  |
| 2       | exp Frail Elderly/                                                                                                                                                                                         |
| 3       | (elder* or old people or older people or old adult* or old person* or older adult* or older person* or senior* or aging person* or ageing person* or aging adult*).tw.                                     |
| 4       | (old adj5 people).tw.                                                                                                                                                                                      |
| 5       | 5. or/1-4                                                                                                                                                                                                  |
| 6       | exp "Delivery of Health Care, Integrated"/                                                                                                                                                                 |
| 7       | ((integrated or coordinated or co-ordinated or comprehensive or collaborative or transmural or continuity or interdisciplinary* or multidisciplinary*) adj5 (health* or care* or delivery or system*)).tw. |
| 8       | exp Managed Care Programs/                                                                                                                                                                                 |
| 9       | ((interdisciplin* or multidisciplin*) adj5 care plan).tw.                                                                                                                                                  |
| 10      | "accountable care organi#ation*".tw.                                                                                                                                                                       |
| 11      | "health maintenance organi#ation*".tw.                                                                                                                                                                     |
| 12      | ((care management or managed care) adj5 (program* or plan* or team* or clinic* or delivery or system*)).tw.                                                                                                |
| 13      | managed care.tw.                                                                                                                                                                                           |
| 14      | (insurance adj5 (case management or disease management)).tw.                                                                                                                                               |
| 15      | exp Patient Care Planning/                                                                                                                                                                                 |
| 16      | Patient Care Management/                                                                                                                                                                                   |
| 17      | Disease Management/                                                                                                                                                                                        |
| 18      | case management.tw.                                                                                                                                                                                        |
| 19      | (disease management adj5 (program* or plan* or team* or clinic* or delivery or system*)).tw.                                                                                                               |
| 20      | Critical Pathways/                                                                                                                                                                                         |
| 21      | ((critical pathway* or clinical pathway* or clinical follow-up) adj5 (team* or clinic* or plan* or program* or care or health* or delivery or system*)).tw.                                                |
| 22      | Comprehensive Health Care/                                                                                                                                                                                 |
| 23      | ((integrated or coordinated or co-ordinated) adj5 (care or clinic* or care team* or care plan*)).tw.                                                                                                       |
| 24      | ((interdisciplin* or multidisciplin*) adj5 (team* or clinic* or plan* or program* or care or health* or delivery or system*)).tw.                                                                          |
| 25      | Continuity of Patient Care/                                                                                                                                                                                |
| 26      | (continuity of care adj5 (program* or plan* or team* or clinic* or delivery or system*)).tw.                                                                                                               |
| 27      | Patient-Centered Care/                                                                                                                                                                                     |
| 28      | ((patient-centered or patient-centred) adj5 (team* or clinic* or plan* or program* or care or health* or delivery or system*)).tw.                                                                         |
| 29      | Patient Care Team/                                                                                                                                                                                         |
| 30      | Community Networks/                                                                                                                                                                                        |
| 31      | Community Health Planning/                                                                                                                                                                                 |
| 32      | ((community care or community health) adj5 (program* or clinic* or plan* or team* or delivery or system*)).tw.                                                                                             |
| 33      | exp Self Care/                                                                                                                                                                                             |
| 34      | ((self-care or self-management) adj5 (program* or clinic* or plan* or team* or delivery or system*)).tw.                                                                                                   |
| 35      | or/6-34                                                                                                                                                                                                    |
| 36      | and/5,35                                                                                                                                                                                                   |
| 37      | review.ab.                                                                                                                                                                                                 |
| 38      | review.pt.                                                                                                                                                                                                 |
| 39      | meta-analysis.ab.                                                                                                                                                                                          |
| 40      | meta-analysis.pt.                                                                                                                                                                                          |
| 41      | meta-analysis.ti.                                                                                                                                                                                          |
| 42      | or/37-41                                                                                                                                                                                                   |
| 43      | letter.pt.                                                                                                                                                                                                 |
| 44      | comment.pt.                                                                                                                                                                                                |
| 45      | editorial.pt.                                                                                                                                                                                              |
| 46      | or/43-45                                                                                                                                                                                                   |
| 47      | 42 not 46                                                                                                                                                                                                  |
| 48      | 36 and 47                                                                                                                                                                                                  |

**Table 2. Search strategy for Cochrane Library**

|                 |    |                                                                                                                                                                                                                 |
|-----------------|----|-----------------------------------------------------------------------------------------------------------------------------------------------------------------------------------------------------------------|
| <b>COCHRANE</b> | 1  | MeSH descriptor: [Aged] explode all trees                                                                                                                                                                       |
|                 | 2  | MeSH descriptor: [Frail Elderly] explode all trees                                                                                                                                                              |
|                 | 3  | (elder* or old people or older people or old adult* or old person* or older adult* or older person* or senior* or aging person* or ageing person* or aging adult*):ti,ab,kw                                     |
|                 | 4  | (old next (people)):ti,ab,kw                                                                                                                                                                                    |
|                 | 5  | {or #1-#4}                                                                                                                                                                                                      |
|                 | 6  | MeSH descriptor: [Delivery of Health Care, Integrated] explode all trees                                                                                                                                        |
|                 | 7  | MeSH descriptor: [Managed Care Programs] explode all trees                                                                                                                                                      |
|                 | 8  | MeSH descriptor: [Self Care] explode all trees                                                                                                                                                                  |
|                 | 9  | ((integrated or coordinated or co-ordinated or comprehensive or collaborative or transamural or continuity) near/5 (health* or care* or delivery or system* or team* or clinic* or plan* or program*)):ti,ab,kw |
|                 | 10 | "managed care":ti,ab,kw                                                                                                                                                                                         |
|                 | 11 | "case management":ti,ab,kw                                                                                                                                                                                      |
|                 | 12 | "disease management":ti,ab,kw                                                                                                                                                                                   |
|                 | 13 | (accountable next care next organi*ation):ti,ab,kw                                                                                                                                                              |
|                 | 14 | (health next maintenance next organi*ation):ti,ab,kw                                                                                                                                                            |
|                 | 15 | ((care next management) near/5 (program* or plan* or team* or clinic* or delivery or system*)):ti,ab,kw                                                                                                         |
|                 | 16 | (community next (care or health or network*)):ti,ab,kw                                                                                                                                                          |
|                 | 17 | "health care planning":ti,ab,kw                                                                                                                                                                                 |
|                 | 18 | (critical next pathway*):ti,ab,kw                                                                                                                                                                               |
|                 | 19 | (clinical next pathway*):ti,ab,kw                                                                                                                                                                               |
|                 | 20 | ("clinical follow-up") near/5 (team* or clinic* or plan* or program* or care or health* or delivery or system*) ti,ab,kw                                                                                        |
|                 | 21 | ("patient-centered" or "patient-centred") near/5 (team* or clinic* or plan* or program* or care or health* or delivery or system*):ti,ab,kw                                                                     |
|                 | 22 | ("patient care" next (team* or clinic* or plan* or program* or care or health* or delivery or system* or manage*)):ti,ab,kw                                                                                     |
|                 | 23 | "patient decision-making":ti,ab,kw                                                                                                                                                                              |
|                 | 24 | ("self-management" or "self-care") near/5 (program* or clinic* or plan* or team* or delivery or system*):ti,ab,kw                                                                                               |
|                 | 25 | {or #6-#24}                                                                                                                                                                                                     |
|                 | 26 | {and #5, #25} in Review                                                                                                                                                                                         |
